# Supplementary material for: Genetic and hypoxic alterations of the microRNA-210-ISCU1/2 axis promote iron–sulfur deficiency and pulmonary hypertension
Source: PubMed Central journal article supplement (PMC4459813; doi:10.15252/emmm.201404511), 2015-03-30

**A**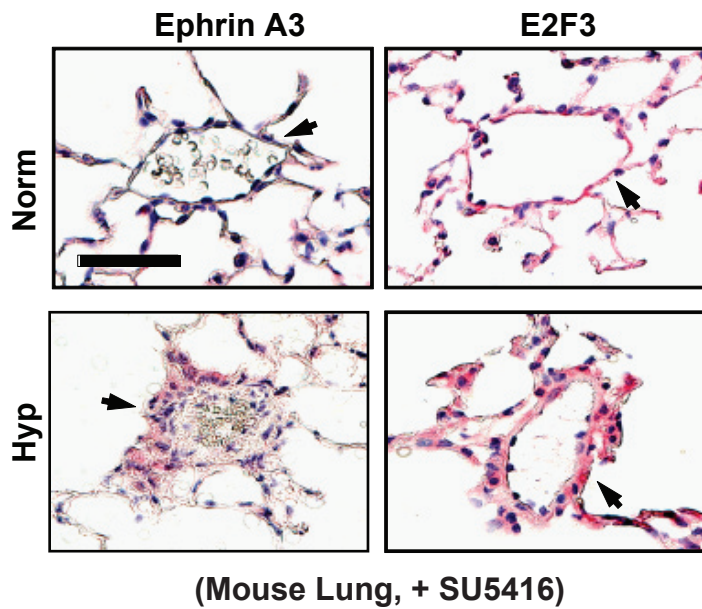**B**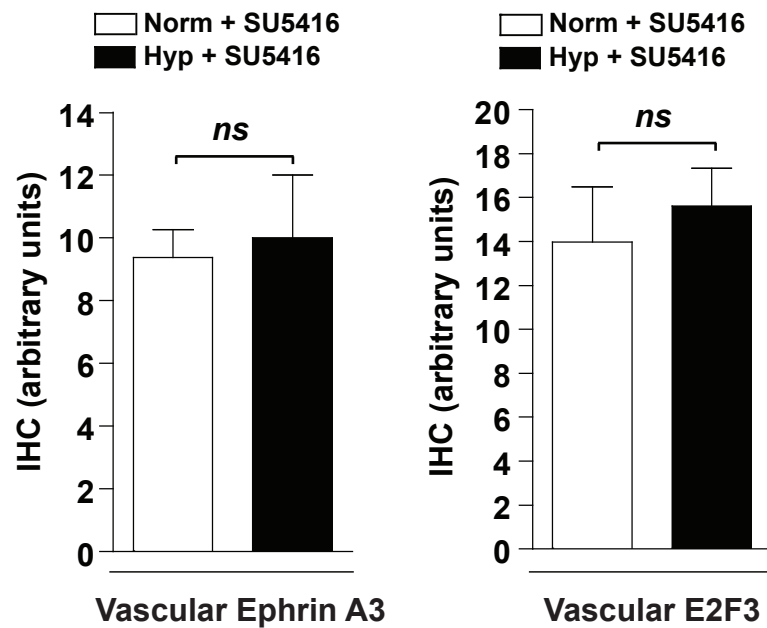**C**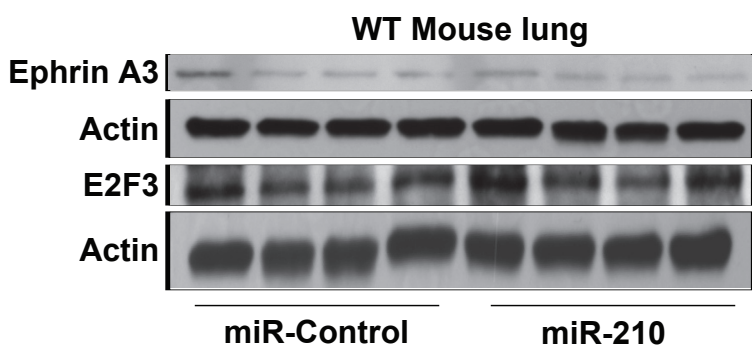**D**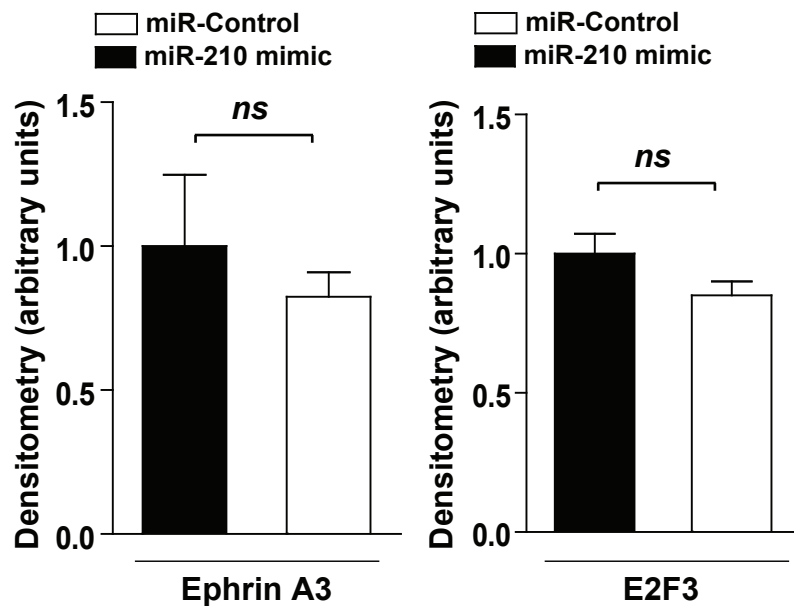**E**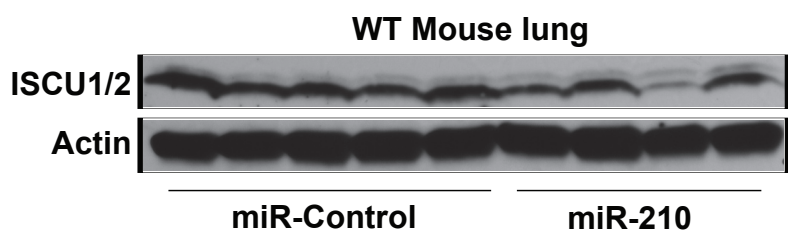**F**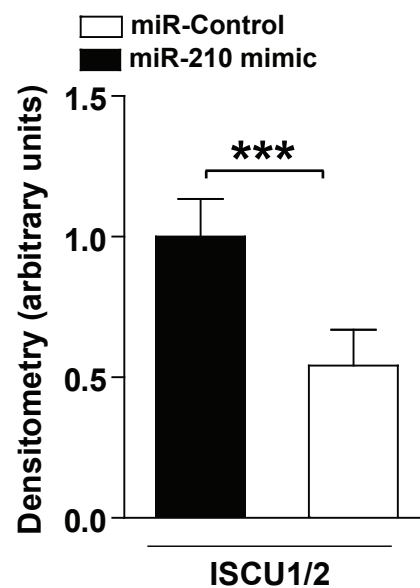

Supplement: emmm0007-0695-sd7.pdf [file emmm0007-0695-sd7.pdf]
