# Supplementary material for: Genetic and hypoxic alterations of the microRNA-210-ISCU1/2 axis promote iron–sulfur deficiency and pulmonary hypertension
Source: PubMed Central journal article supplement (PMC4459813; doi:10.15252/emmm.201404511), 2015-03-30
Supplement: emmm0007-0695-sd15.pdf [file emmm0007-0695-sd15.pdf]

**A**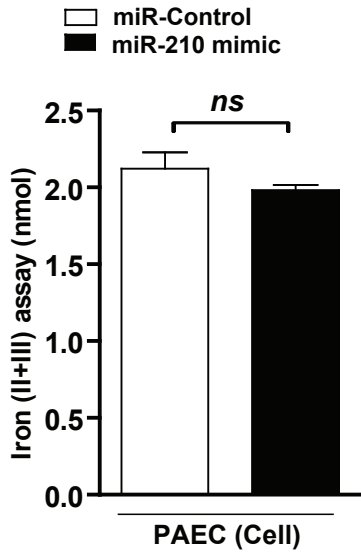**B**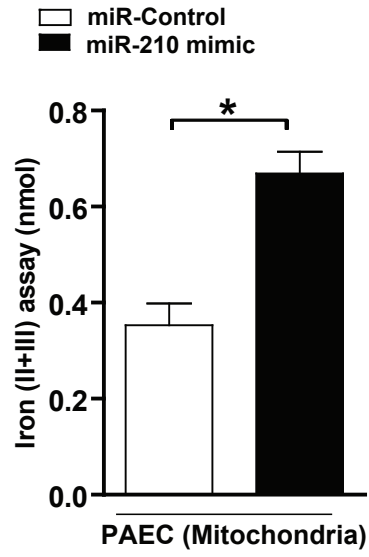**C**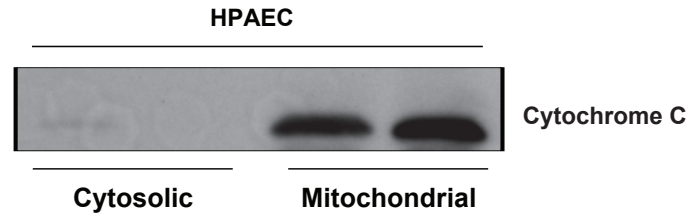

White et al. Fig. S15
