# Supplementary material for: Genetic and hypoxic alterations of the microRNA-210-ISCU1/2 axis promote iron–sulfur deficiency and pulmonary hypertension
Source: PubMed Central journal article supplement (PMC4459813; doi:10.15252/emmm.201404511), 2015-03-30
Supplement: emmm0007-0695-sd17.pdf [file emmm0007-0695-sd17.pdf]

**Table S1. Clinical characteristics of PAH patients.** These patients were previously described (Bertero et al, 2014).

| <b>Patient</b>                 | <b>Age (yr)</b> | <b>Gender</b> | <b>mPAP (mmHg)</b> | <b>Clinical description</b>      |
|--------------------------------|-----------------|---------------|--------------------|----------------------------------|
| 1                              | 34              | Female        | 50                 | Autopsy, Idiopathic              |
| 2                              | 64              | Female        | 55                 | Autopsy, Idiopathic              |
| 3                              | 12              | Male          | 53                 | Lung transplant, BMPRII mutation |
| 4                              | 16              | Male          | 62                 | Lung transplant, Idiopathic      |
| 5                              | 1               | Male          | 50                 | Lung resection, Trisomy 21       |
| 6                              | 19              | Male          | 48                 | Lung resection, Idiopathic       |
| <b>Scleroderma-Induced PAH</b> |                 |               |                    |                                  |
| <b>Patient</b>                 | <b>Age (yr)</b> | <b>Gender</b> | <b>mPAP (mmHg)</b> | <b>Clinical description</b>      |
| 1                              | 68              | Female        | 44                 | Lung transplant, Scleroderma     |
| 2                              | 56              | Male          | 50                 | Lung transplant, Scleroderma     |
| 3                              | 43              | Male          | 37                 | Lung transplant, Scleroderma     |
| 4                              | 51              | Male          | 48                 | Lung transplant, Scleroderma     |
| 5                              | 59              | Female        | 55                 | Lung transplant, Scleroderma     |
| 6                              | 50              | Male          | 33                 | Lung transplant, Scleroderma     |
| 7                              | 67              | Male          | 50                 | Lung transplant, Scleroderma     |
| 8                              | 39              | Male          | 40                 | Lung transplant, Scleroderma     |
| 9                              | 42              | Female        | 57                 | Lung transplant, Scleroderma     |
| 10                             | 46              | Male          | 47                 | Lung transplant, Scleroderma     |
| 11                             | 60              | Female        | 66                 | Autopsy, Scleroderma             |
| 12                             | 54              | Female        | 54                 | Autopsy, Scleroderma             |
| 13                             | 72              | Female        | 53                 | Autopsy, Scleroderma             |
