# Supplementary material for: Genetic and hypoxic alterations of the microRNA-210-ISCU1/2 axis promote iron–sulfur deficiency and pulmonary hypertension
Source: PubMed Central journal article supplement (PMC4459813; doi:10.15252/emmm.201404511), 2015-03-30
Supplement: emmm0007-0695-sd18.pdf [file emmm0007-0695-sd18.pdf]

**Table S2. Demographic information of 10 human subjects undergoing pulmonary arterial catheterization for clinical dyspnea.** Five subjects were found to have mean pulmonary arterial pressure (PAP)  $\geq$  25 mm Hg (PCWP $\leq$ 15 mmHg), and five subjects were found to have mean PAP  $<$  25 mm Hg. Plasma samples were drawn at the pulmonary capillary wedge position from which circulating miR-210 levels were measured.

|                                                 | <b>Mean PAP<math>&lt;</math>25 mm Hg</b> |                | <b>Mean PAP<math>\geq</math> 25 mm Hg</b> |                | p-value |
|-------------------------------------------------|------------------------------------------|----------------|-------------------------------------------|----------------|---------|
|                                                 | Mean                                     | Standard Error | Mean                                      | Standard Error |         |
| <b>Age</b>                                      | 55.4                                     | 9.5            | 56                                        | 8.8            | 0.96    |
| <b>Systolic blood pressure (mm Hg)</b>          | 138                                      | 7.5            | 125                                       | 2.4            | 0.06    |
| <b>Diastolic blood pressure (mm Hg)</b>         | 79                                       | 2.8            | 77.8                                      | 1.6            | 0.96    |
| <b>Cardiac index (L/min/m<sup>2</sup>)</b>      | 3.1                                      | 0.3            | 2.8                                       | 0.5            | 0.67    |
| <b>Mean pulmonary arterial pressure (mm Hg)</b> | 19.6                                     | 1.7            | 37.4                                      | 5.7            | 0.02    |
| <b>Male</b>                                     | 3/5                                      |                | 1/5                                       |                |         |
