# Supplementary material for: Genetic and hypoxic alterations of the microRNA-210-ISCU1/2 axis promote iron–sulfur deficiency and pulmonary hypertension
Source: PubMed Central journal article supplement (PMC4459813; doi:10.15252/emmm.201404511), 2015-03-30
Supplement: emmm0007-0695-sd19.pdf [file emmm0007-0695-sd19.pdf]

**Table S3. Clinical characteristics of PH patients analyzed for pulmonary Fe-S expression**

| <b>Patient</b> | <b>Age</b> | <b>Gender</b> | <b>Primary lung disease</b> | <b>PAP</b> | <b>Mean PAP</b> |
|----------------|------------|---------------|-----------------------------|------------|-----------------|
| 1              | 70         | M             | IPF                         | 43/19      | 29              |
| 2              | 62         | M             | COPD                        | 38/20      | 27              |
| 3              | 50         | F             | Scleroderma                 | 80/24      | 46              |

M: Male. F: Female. IPF: Idiopathic Pulmonary Fibrosis. COPD: Chronic Obstructive Pulmonary Disease.
