# Supplementary material for: Genetic and hypoxic alterations of the microRNA-210-ISCU1/2 axis promote iron–sulfur deficiency and pulmonary hypertension
Source: PubMed Central journal article supplement (PMC4459813; doi:10.15252/emmm.201404511), 2015-03-30

Fig S7-c. Ephrin A3

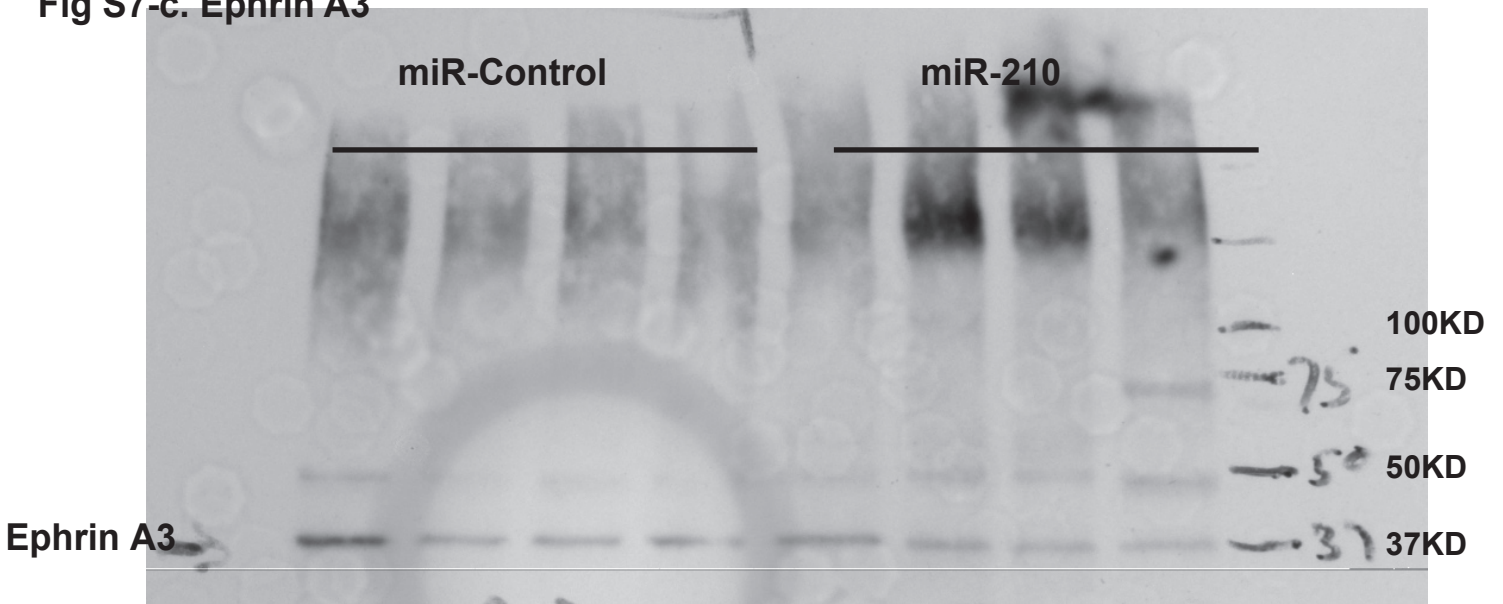

Fig S7-c. ACTIN for Ephrin A3

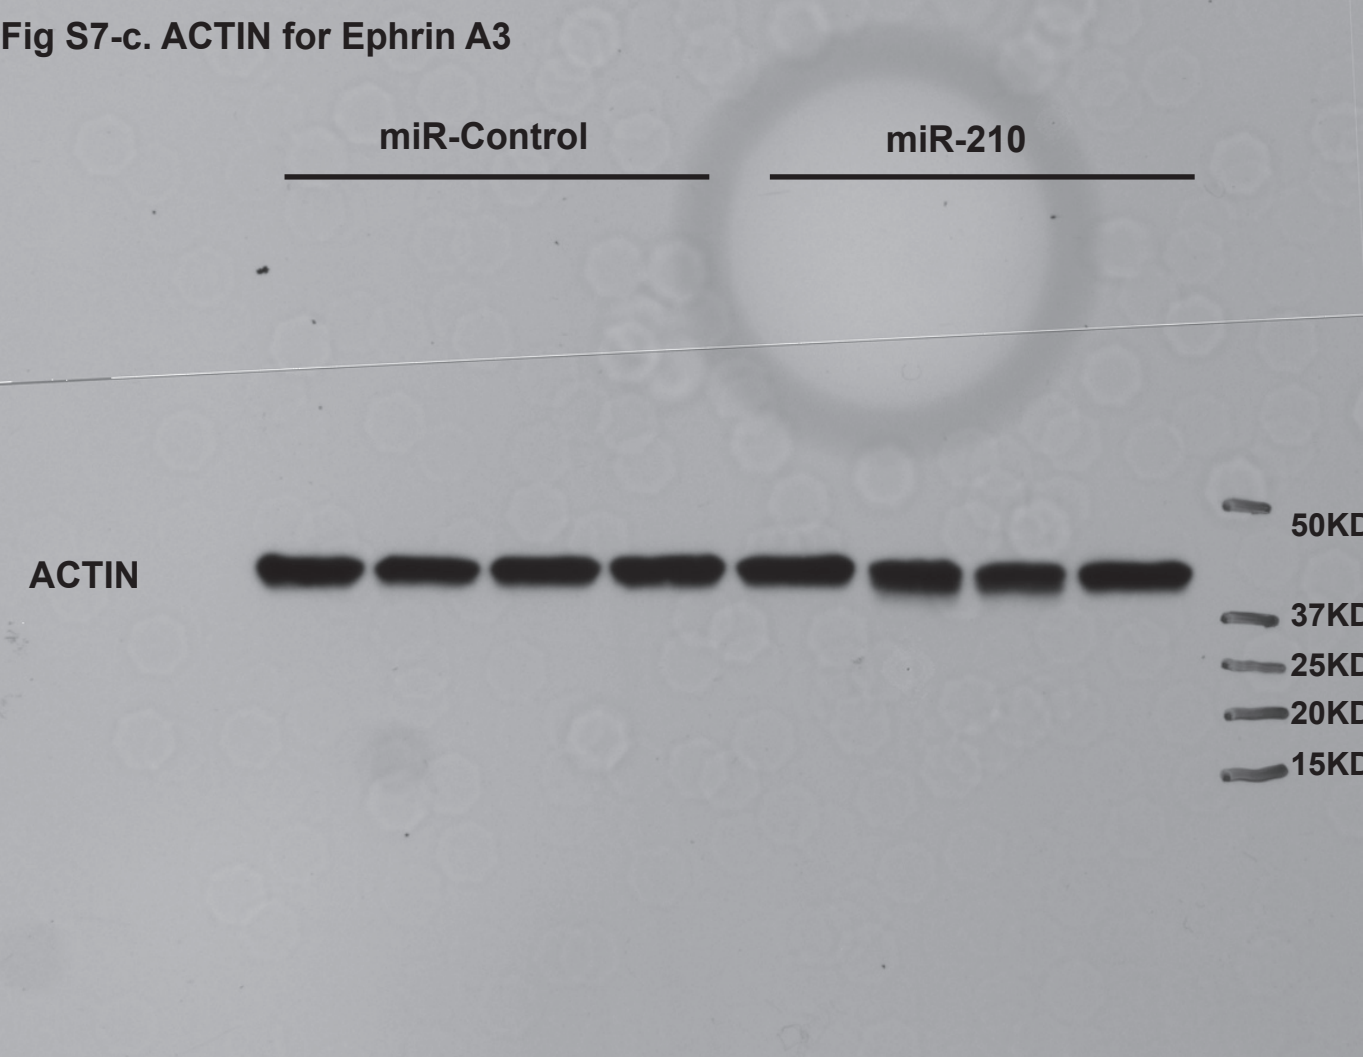

Fig S7-c. E2F3

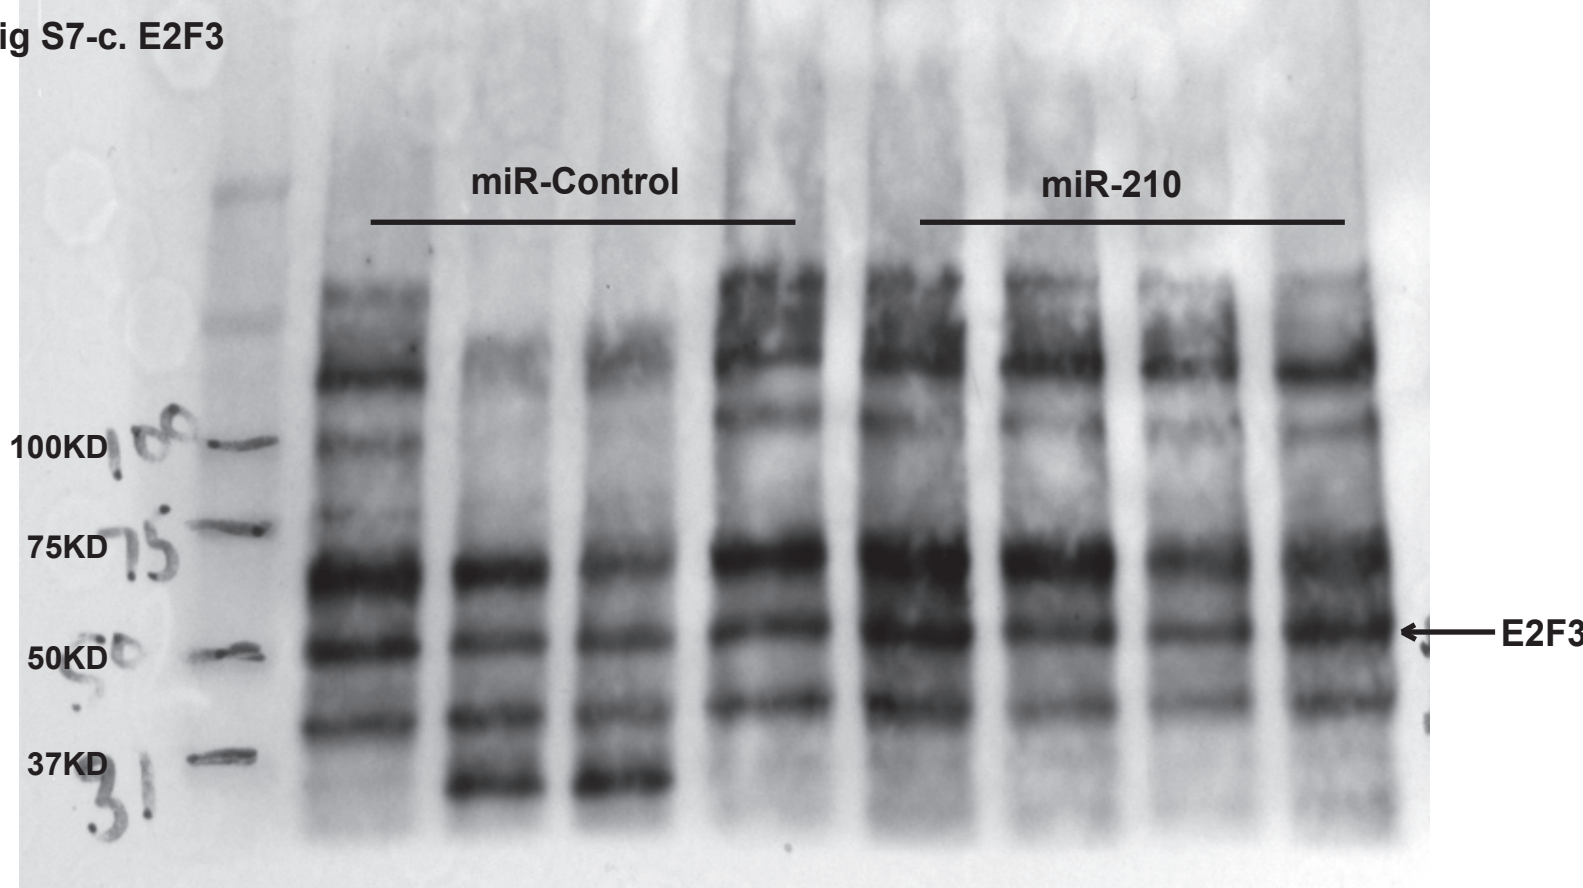

Fig S7-c. ACTIN for E2F3

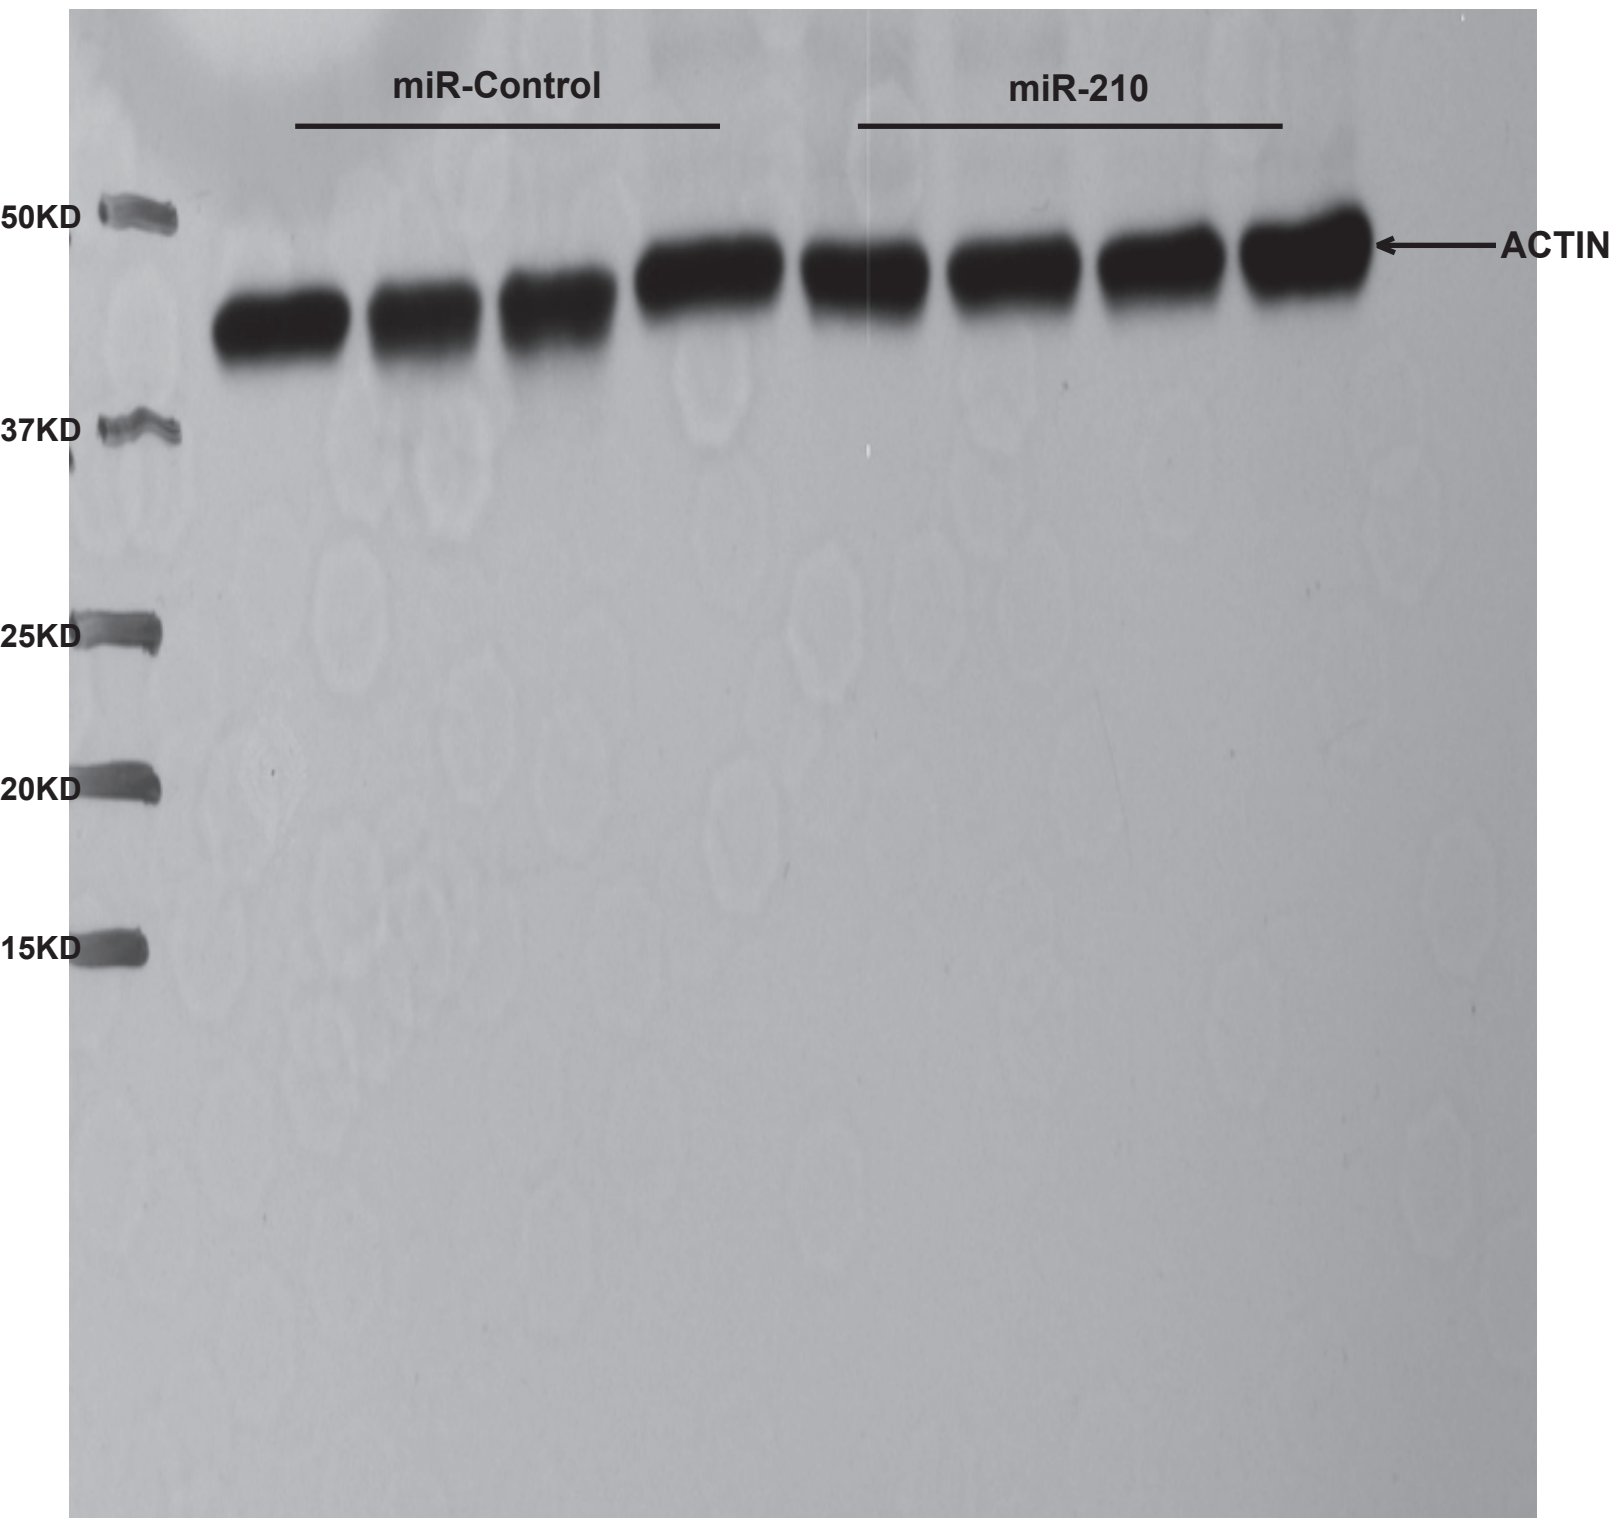

Fig S7-e. ISCU1/2

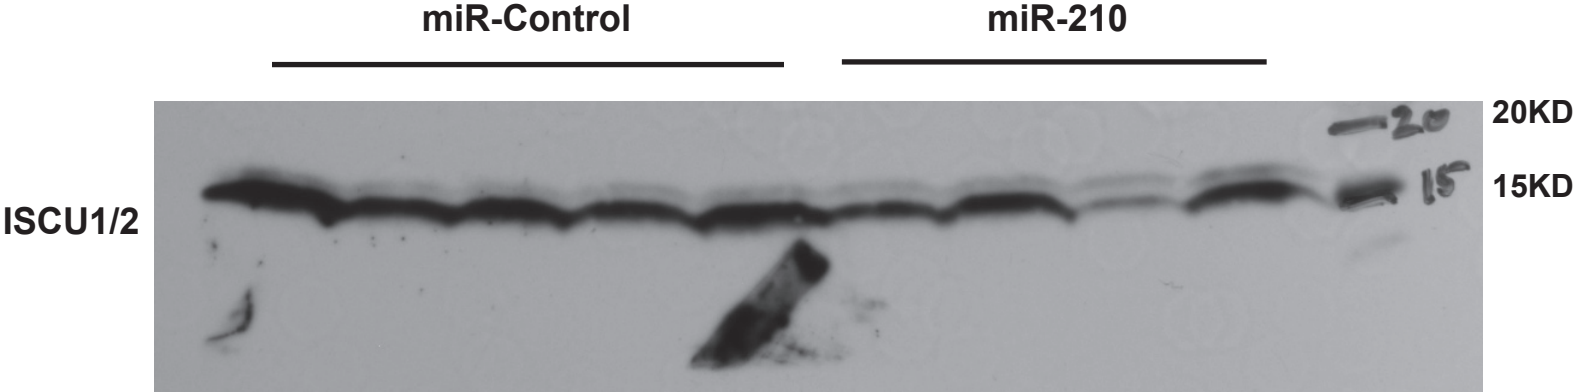

Fig S7-e. ACTIN

miR-Control

miR-210

ACTIN

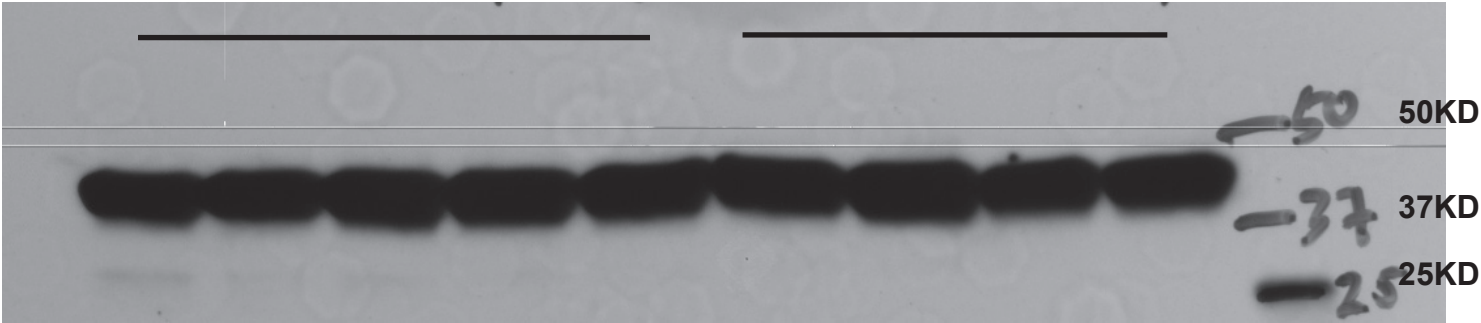

Supplement: emmm0007-0695-sd23.pdf [file emmm0007-0695-sd23.pdf]
