# Supplementary material for: Genetic and hypoxic alterations of the microRNA-210-ISCU1/2 axis promote iron–sulfur deficiency and pulmonary hypertension
Source: PubMed Central journal article supplement (PMC4459813; doi:10.15252/emmm.201404511), 2015-03-30

Fig 2A. FLAG for GRX2

1.2.1

50 —  
37 —  
25 —

Norm-GRX2 Hyp-GRX2 Norm-GCN4 Hyp-GCN4

FLAG

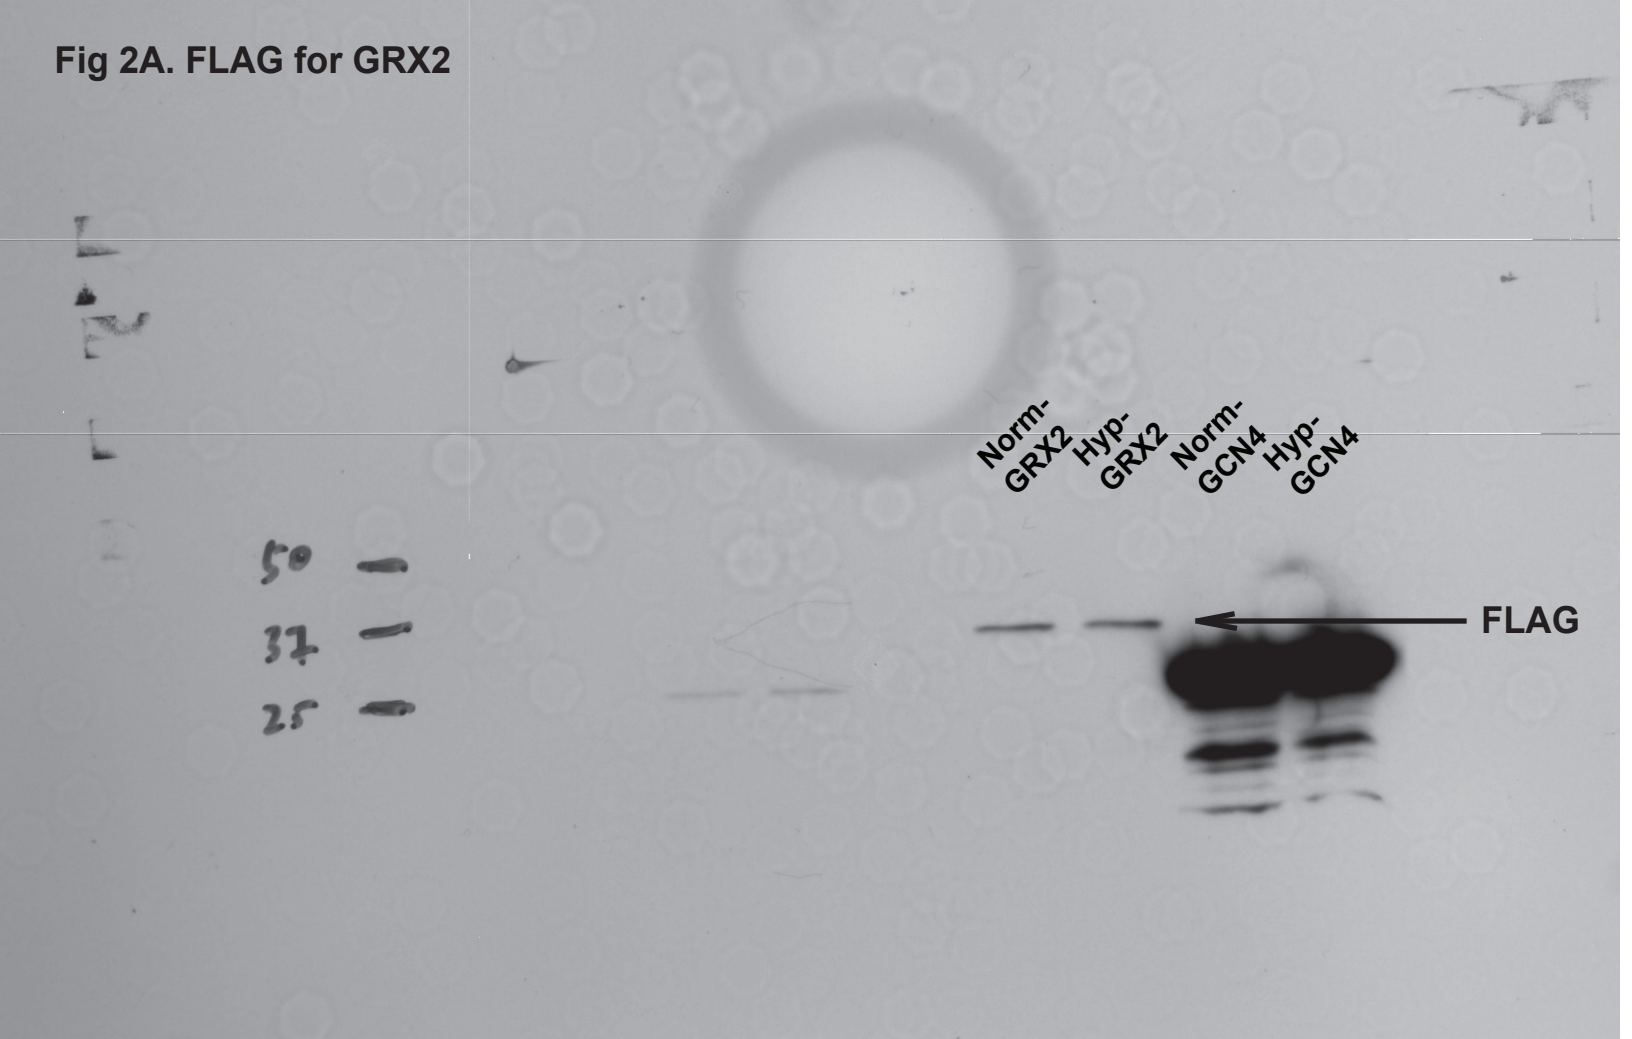

Fig 2A. FLAG for GCN4

50KD  
37KD  
25KD

Norm-GRX2 Hyp-GRX2 Norm-GCN4 Hyp-GCN4

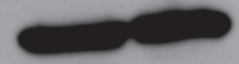

FLAG

Fig 2A. Stripped membrane for ACTIN

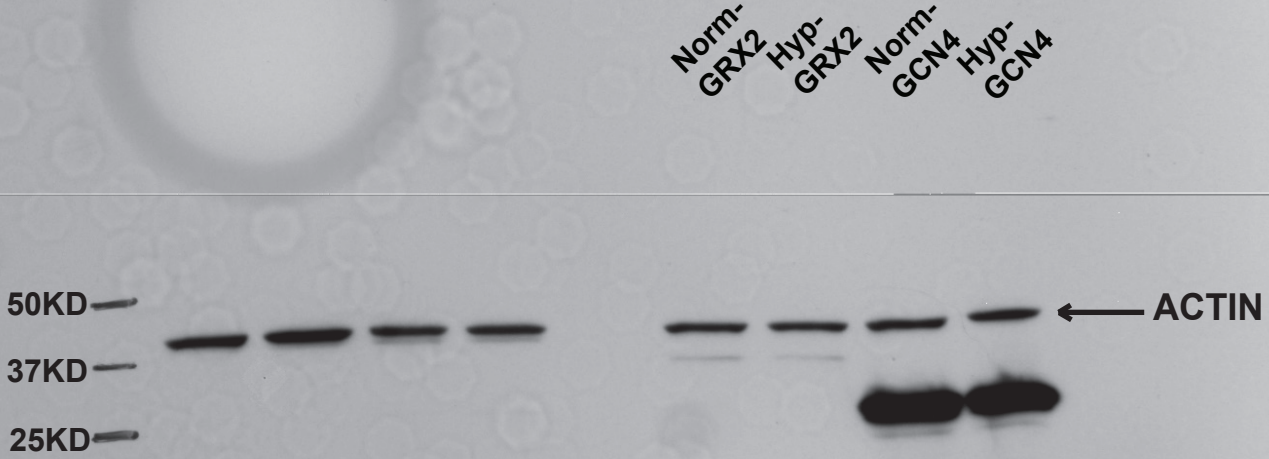

Fig 2B. FLAG for GRX2

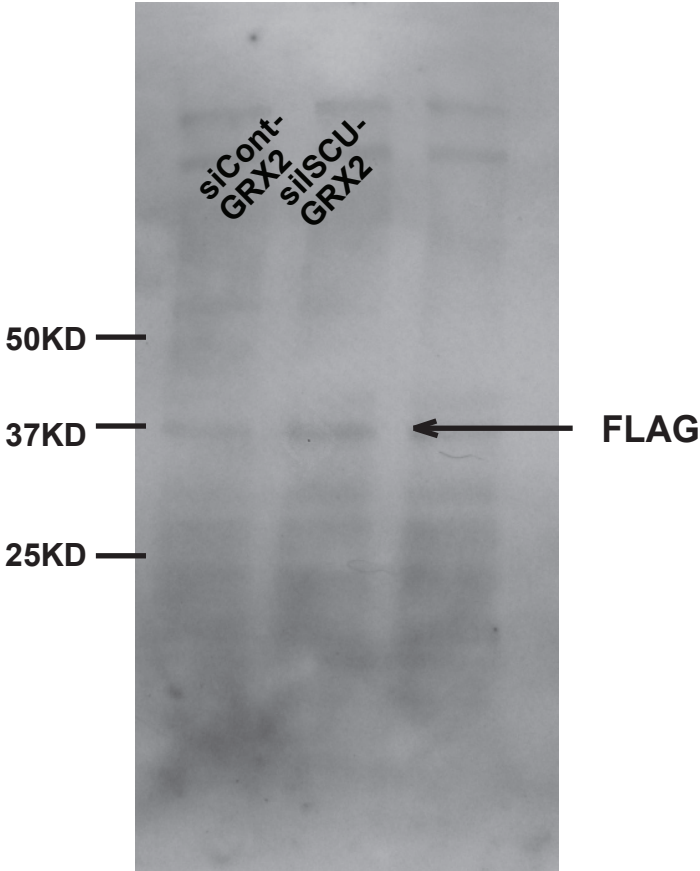

Fig 2B. FLAG for GCB4

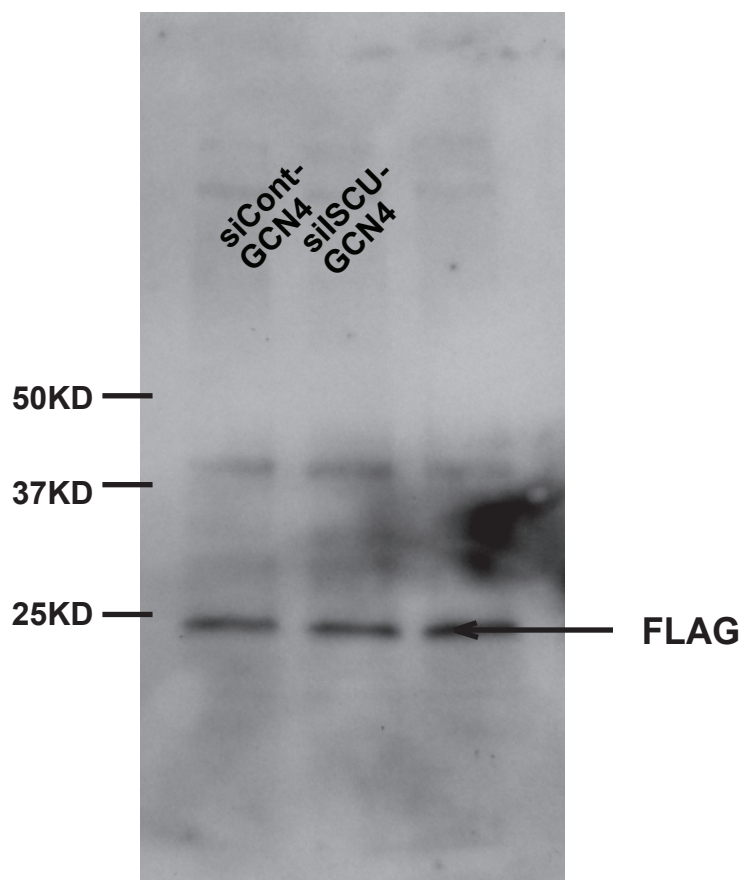

Fig 2B. ACTIN for GRX2

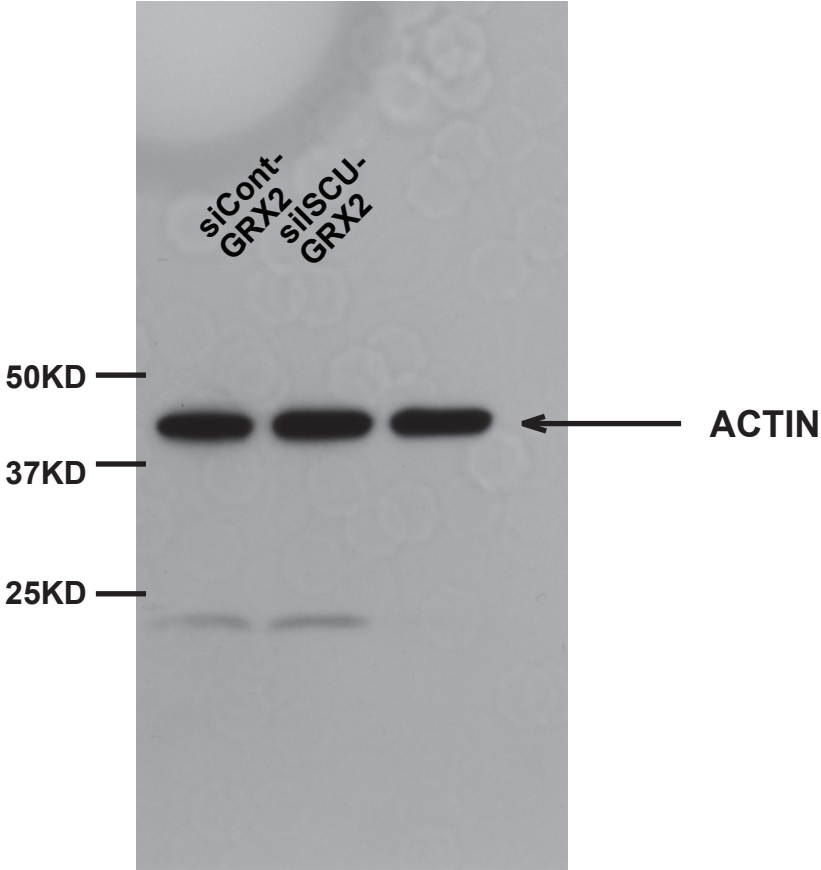

Fig 2B. ACTIN for GCN4

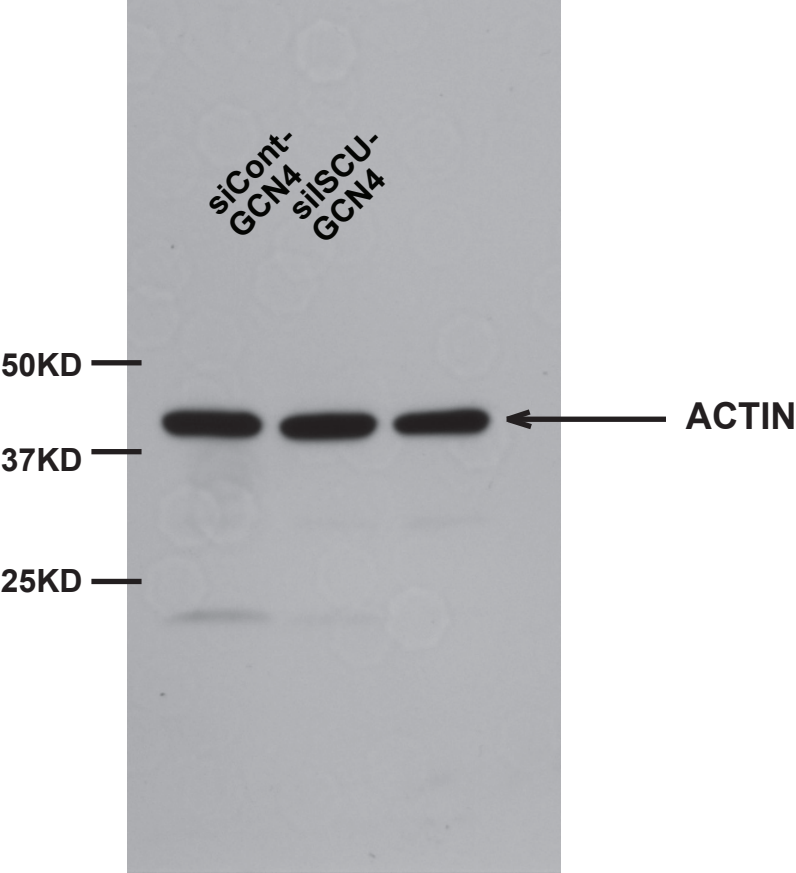

Fig 2C. FLAG for GRX2

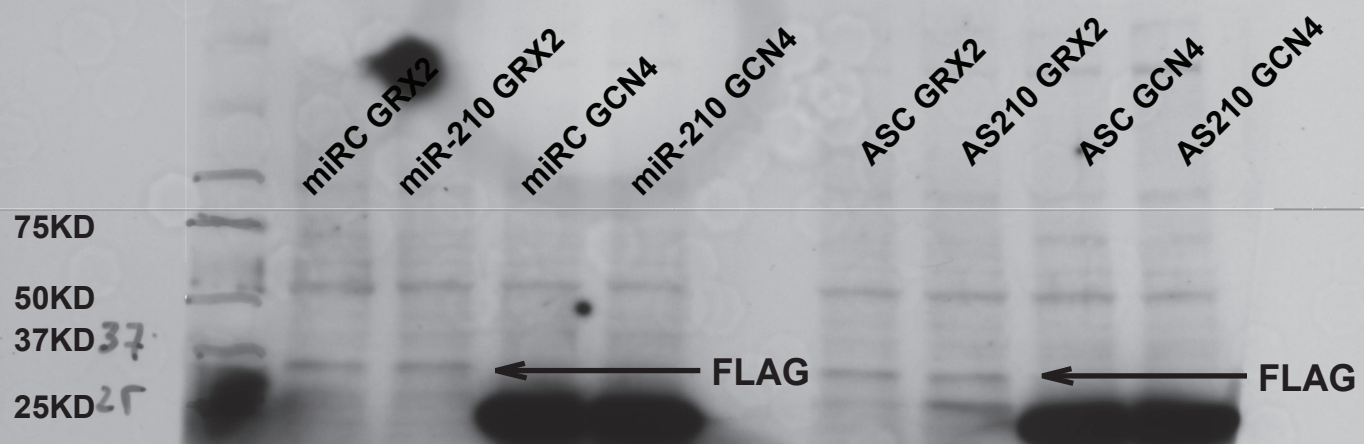



Fig 2C. FLAG for GCN4

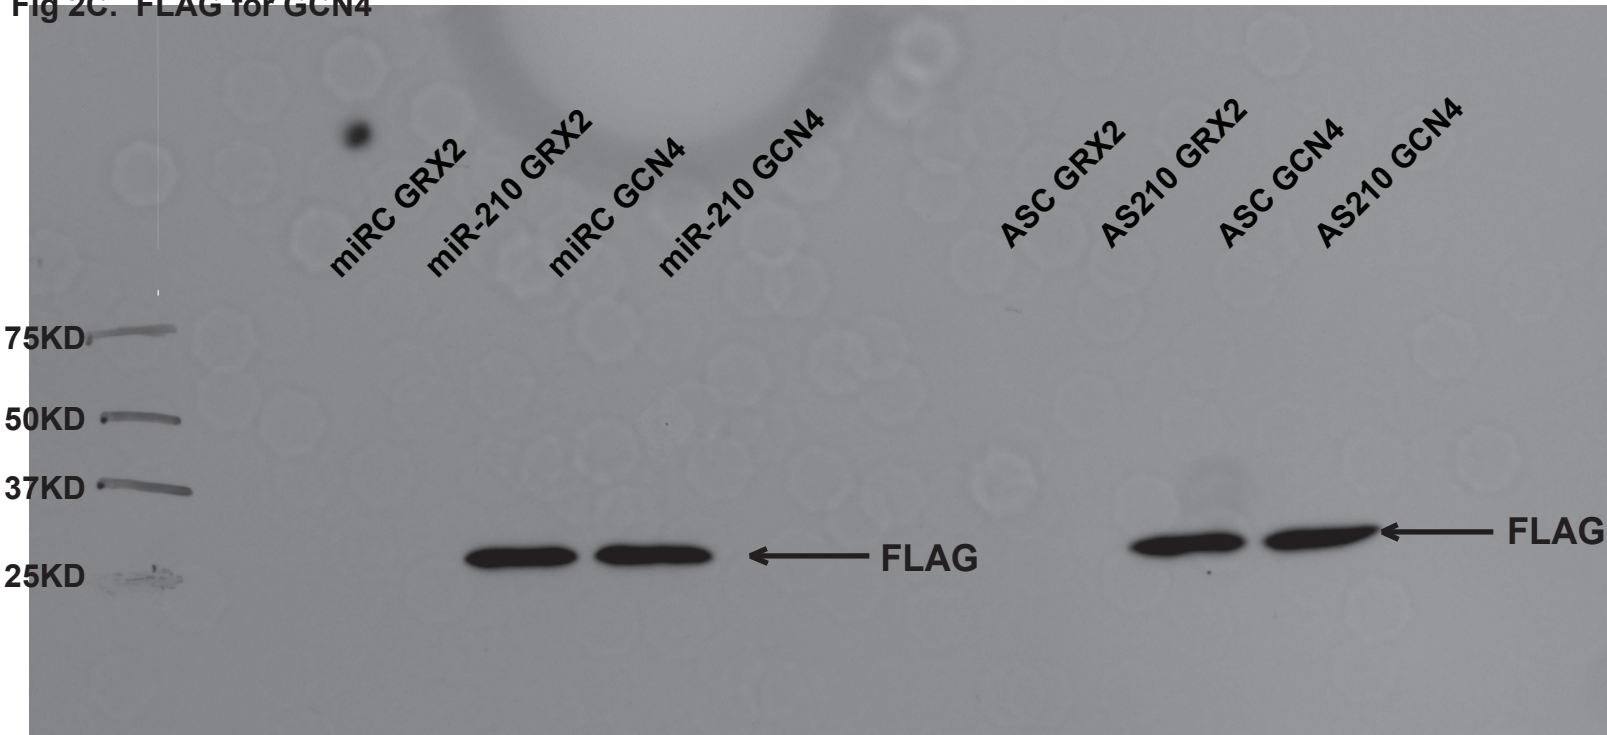

Fig 2C. Stripped membrane ACTIN for GRX2 and GCN4

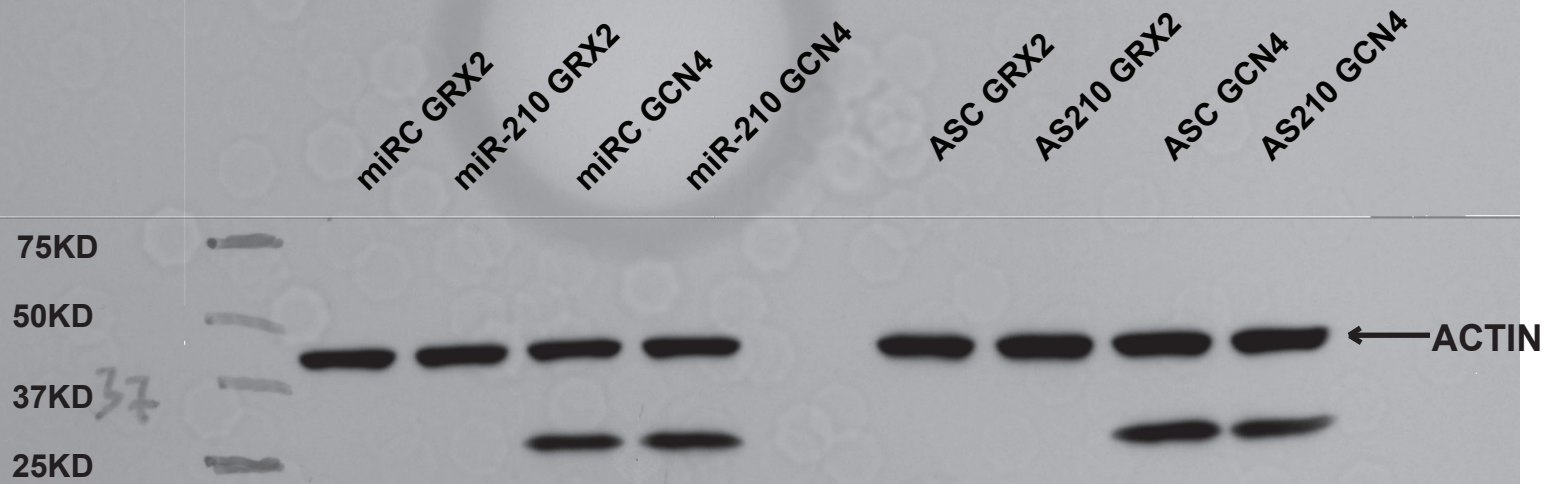

Supplement: emmm0007-0695-sd26.pdf [file emmm0007-0695-sd26.pdf]
